# Supplementary material for: Comparison of surface wind speed and wind speed profiles in the Taklimakan Desert
Source: PeerJ. 2022 Apr 1;10:e13001. doi: 10.7717/peerj.13001 (PMC8985592; doi:10.7717/peerj.13001)
Supplement: Supplemental Information 1 [file peerj-10-13001-s001.xls]

## Sheet: 2014.8.27wind speed of xiaotang
		XT-0.5	XT-1	XT-2	XT-4	XT-10		TZ-0.5	TZ-1	TZ-2	TZ-4	TZ-10
	2014-08-27	0.513945	0.511495	0.534464	0.61901	1.1511		0.739051	0.807454	1.17039	1.42137	2.08781	7.4791
	2014-08-27 00:30:00	0.582996	0.585985	0.773404	1.15678	1.71809		0.969357	1.02532	1.73858	1.99942	2.61887
	2014-08-27 01:00:00	1.2826	1.35667	1.94282	2.24264	2.98595		0.862248	0.832481	1.31698	1.56709	2.33747
	2014-08-27 01:30:00	0.6207	0.636905	0.958106	1.46567	2.36977		0.0865924	0.128356	0	0	0.656339
	2014-08-27 02:00:00	0.215993	0.220268	0.315612	0.485188	1.72664		0.513945	0.511495	0.534464	0.61901	1.1511
	2014-08-27 02:30:00	0.141241	0.135019	0.123821	0.359298	1.44877		0.582996	0.585985	0.773404	1.15678	1.71809
	2014-08-27 03:00:00	0.427396	0.44177	0.602603	0.874991	1.97727		1.2826	1.35667	1.94282	2.24264	2.98595
	2014-08-27 03:30:00	1.37045	1.48971	2.06168	2.4892	3.18095		0.6207	0.636905	0.958106	1.46567	2.36977
	2014-08-27 04:00:00	0.905617	0.95692	1.39914	1.62972	2.29665		0.215993	0.220268	0.315612	0.485188	1.72664
	2014-08-27 04:30:00	0.896068	0.967802	1.3717	1.71004	2.47639		0.141241	0.135019	0.123821	0.359298	1.44877
	2014-08-27 05:00:00	0.884297	0.998672	1.23073	1.5502	2.25948		0.427396	0.44177	0.602603	0.874991	1.97727
	2014-08-27 05:30:00	1.48416	1.61852	1.89227	2.1809	2.64394		1.37045	1.48971	2.06168	2.4892	3.18095
	2014-08-27 06:00:00	1.93988	2.03405	2.05587	2.59775	3.03202		0.905617	0.95692	1.39914	1.62972	2.29665
	2014-08-27 06:30:00	1.65494	1.744	2.28223	2.52262	2.92833		0.896068	0.967802	1.3717	1.71004	2.47639
	2014-08-27 07:00:00	2.07491	2.23882	2.97849	3.28784	3.64345		0.884297	0.998672	1.23073	1.5502	2.25948
	2014-08-27 07:30:00	2.90664	3.08186	3.4649	3.90463	4.19611		1.48416	1.61852	1.89227	2.1809	2.64394
	2014-08-27 08:00:00	3.54225	3.87161	4.27835	4.75027	5.07444		1.93988	2.03405	2.05587	2.59775	3.03202
	2014-08-27 08:30:00	4.62804	4.84391	5.12489	5.8401	6.16068		1.65494	1.744	2.28223	2.52262	2.92833
	2014-08-27 09:00:00	4.43172	4.74042	4.90771	5.77914	5.88489		2.07491	2.23882	2.97849	3.28784	3.64345
	2014-08-27 09:30:00	4.62716	4.98672	5.84302	6.27487	6.75064		2.90664	3.08186	3.4649	3.90463	4.19611
	2014-08-27 10:00:00	4.62671	5.00848	6.01852	6.60945	7.19302		3.54225	3.87161	4.27835	4.75027	5.07444
	2014-08-27 10:30:00	4.62915	4.98272	6.13395	6.87311	7.54371		4.62804	4.84391	5.12489	5.8401	6.16068
	2014-08-27 11:00:00	4.4064	4.85169	6.20271	7.12504	7.53285		4.43172	4.74042	4.90771	5.77914	5.88489
	2014-08-27 11:30:00	4.23028	4.6387	5.86611	6.68354	7.17907		4.62716	4.98672	5.84302	6.27487	6.75064
	2014-08-27 12:00:00	4.23806	4.54076	5.53561	6.17064	6.65152		4.62671	5.00848	6.01852	6.60945	7.19302
	2014-08-27 12:30:00	4.22895	4.58074	5.51523	6.17828	6.68226		4.62915	4.98272	6.13395	6.87311	7.54371
	2014-08-27 13:00:00	4.1721	4.50789	6.03041	7.07924	7.66805		4.4064	4.85169	6.20271	7.12504	7.53285
	2014-08-27 13:30:00	4.59295	4.86723	6.55011	7.50214	8.2586		4.23028	4.6387	5.86611	6.68354	7.17907
	2014-08-27 14:00:00	4.40995	4.6387	6.32813	7.05022	7.54978		4.23806	4.54076	5.53561	6.17064	6.65152
	2014-08-27 14:30:00	3.79344	4.02907	5.43254	6.21834	6.749		4.22895	4.58074	5.51523	6.17828	6.68226
	2014-08-27 15:00:00	4.66691	4.9343	6.58955	7.20275	7.91454		4.1721	4.50789	6.03041	7.07924	7.66805
	2014-08-27 15:30:00	5.28631	5.52484	7.4791	8.02993	8.90492		4.59295	4.86723	6.55011	7.50214	8.2586
	2014-08-27 16:00:00	5.11419	5.39891	7.32751	7.88651	8.75057		4.40995	4.6387	6.32813	7.05022	7.54978
	2014-08-27 16:30:00	4.5703	4.93764	6.68513	7.26984	7.9434		3.79344	4.02907	5.43254	6.21834	6.749
	2014-08-27 17:00:00	4.71866	4.91187	6.61986	7.17302	7.92698		4.66691	4.9343	6.58955	7.20275	7.91454
	2014-08-27 17:30:00	4.82148	5.12241	6.79664	7.32473	8.0462		5.28631	5.52484	7.4791	8.02993	8.90492
	2014-08-27 18:00:00	4.46392	4.70089	6.26124	6.68794	7.39482		5.11419	5.39891	7.32751	7.88651	8.75057
	2014-08-27 18:30:00	3.37458	3.53559	4.63554	4.99964	5.52071		4.5703	4.93764	6.68513	7.26984	7.9434
	2014-08-27 19:00:00	2.54086	2.6006	3.49786	3.80067	4.33254		4.71866	4.91187	6.61986	7.17302	7.92698
	2014-08-27 19:30:00	1.87126	2.02272	2.73904	3.04477	3.41988		4.82148	5.12241	6.79664	7.32473	8.0462
	2014-08-27 20:00:00	1.44907	1.53857	2.09959	2.33322	2.78648		4.46392	4.70089	6.26124	6.68794	7.39482
	2014-08-27 20:30:00	1.23098	1.26607	1.62801	1.85603	2.28434		3.37458	3.53559	4.63554	4.99964	5.52071
	2014-08-27 21:00:00	1.51303	1.58388	2.09296	2.31581	2.64709		2.54086	2.6006	3.49786	3.80067	4.33254
	2014-08-27 21:30:00	0.775918	0.851206	1.23482	1.42687	1.90791		1.87126	2.02272	2.73904	3.04477	3.41988
	2014-08-27 22:00:00	1.00867	1.08329	1.50093	1.77419	2.30527		1.44907	1.53857	2.09959	2.33322	2.78648
	2014-08-27 22:30:00	0.899177	0.942706	1.29079	1.5566	2.08316		1.23098	1.26607	1.62801	1.85603	2.28434
	2014-08-27 23:00:00	0.823001	0.876746	1.2438	1.50051	2.14981		1.51303	1.58388	2.09296	2.31581	2.64709
	2014-08-27 23:30:00	1.03132	1.1055	1.44405	1.76057	2.42954		0.775918	0.851206	1.23482	1.42687	1.90791

## Sheet: 2014.8.27temperature of  x t
			XT-0.5	XT-1	XT-2	XT-4	XT-10			TZ-0.5	TZ-1	TZ-2	TZ-4	TZ-10
		2014-08-27	22.3207	22.8175	23.4208	24.2282	25.5295			25.9638	26.23	26.78	27.3522	27.7123
		2014-08-27 00:30:00	22.7205	23.284	23.7821	24.3275	25.2441			25.1222	25.5428	26.0536	26.5994	26.987
		2014-08-27 01:00:00	22.9013	23.2028	23.6315	24.1959	24.7761			24.5565	25.0451	25.5908	26.1538	26.5128
		2014-08-27 01:30:00	22.2612	22.513	22.9919	23.5456	24.1499			23.3935	24.0964	24.8121	25.4536	26.3284
		2014-08-27 02:00:00	20.8717	21.2401	21.627	22.2677	23.0956			22.3207	22.8175	23.4208	24.2282	25.5295
		2014-08-27 02:30:00	20.2732	20.705	21.0826	21.6381	22.4959			22.7205	23.284	23.7821	24.3275	25.2441
		2014-08-27 03:00:00	19.6979	20.2071	20.6884	21.3593	22.0787			22.9013	23.2028	23.6315	24.1959	24.7761
		2014-08-27 03:30:00	19.9985	20.2272	20.6405	21.1936	21.4999			22.2612	22.513	22.9919	23.5456	24.1499
		2014-08-27 04:00:00	19.958	20.1573	20.6294	21.2234	21.7056			20.8717	21.2401	21.627	22.2677	23.0956
		2014-08-27 04:30:00	19.7794	20.0362	20.5847	21.2695	21.7789			20.2732	20.705	21.0826	21.6381	22.4959
		2014-08-27 05:00:00	20.4977	20.776	21.2102	21.7874	22.1422			19.6979	20.2071	20.6884	21.3593	22.0787
		2014-08-27 05:30:00	21.291	21.4907	21.7983	22.228	22.3808			19.9985	20.2272	20.6405	21.1936	21.4999
		2014-08-27 06:00:00	21.3513	21.5003	21.742	22.1163	22.1729			19.958	20.1573	20.6294	21.2234	21.7056
		2014-08-27 06:30:00	21.2707	21.2245	21.4167	21.6586	21.5755			19.7794	20.0362	20.5847	21.2695	21.7789
		2014-08-27 07:00:00	22.2366	22.1242	22.2474	22.4365	22.2202			20.4977	20.776	21.2102	21.7874	22.1422
		2014-08-27 07:30:00	24.0487	23.8831	23.9102	24.034	23.7603			21.291	21.4907	21.7983	22.228	22.3808
		2014-08-27 08:00:00	26.5472	26.2606	26.212	26.2834	25.9233			21.3513	21.5003	21.742	22.1163	22.1729
		2014-08-27 08:30:00	29.3629	28.9537	28.8351	28.8449	28.4228			21.2707	21.2245	21.4167	21.6586	21.5755
		2014-08-27 09:00:00	30.9498	30.4668	30.3139	30.2734	29.8533			22.2366	22.1242	22.2474	22.4365	22.2202
		2014-08-27 09:30:00	31.4682	31.1067	30.9962	30.9855	30.5995			24.0487	23.8831	23.9102	24.034	23.7603
		2014-08-27 10:00:00	32.4807	32.1124	31.9927	31.9339	31.534			26.5472	26.2606	26.212	26.2834	25.9233
		2014-08-27 10:30:00	32.7898	32.4345	32.2866	32.2087	31.7644			29.3629	28.9537	28.8351	28.8449	28.4228
		2014-08-27 11:00:00	34.1044	33.5269	33.1911	32.9072	32.3474			30.9498	30.4668	30.3139	30.2734	29.8533
		2014-08-27 11:30:00	34.5386	33.9793	33.638	33.3334	32.76			31.4682	31.1067	30.9962	30.9855	30.5995
		2014-08-27 12:00:00	34.2231	33.7988	33.6308	33.5251	33.0728			32.4807	32.1124	31.9927	31.9339	31.534
		2014-08-27 12:30:00	34.1096	33.7689	33.6387	33.5823	33.1695			32.7898	32.4345	32.2866	32.2087	31.7644
		2014-08-27 13:00:00	33.8282	33.5857	33.5042	33.466	33.0933			34.1044	33.5269	33.1911	32.9072	32.3474
		2014-08-27 13:30:00	33.9493	33.5968	33.4568	33.361	32.9543			34.5386	33.9793	33.638	33.3334	32.76
		2014-08-27 14:00:00	33.8225	33.4666	33.3362	33.2446	32.8534			34.2231	33.7988	33.6308	33.5251	33.0728
		2014-08-27 14:30:00	33.8357	33.479	33.3479	33.2508	32.8661			34.1096	33.7689	33.6387	33.5823	33.1695
		2014-08-27 15:00:00	34.1117	33.6776	33.5085	33.4139	32.9936			33.8282	33.5857	33.5042	33.466	33.0933
		2014-08-27 15:30:00	34.3647	33.824	33.5936	33.4425	32.9439			33.9493	33.5968	33.4568	33.361	32.9543
		2014-08-27 16:00:00	33.7807	33.3443	33.1782	33.0845	32.6299			33.8225	33.4666	33.3362	33.2446	32.8534
		2014-08-27 16:30:00	33.4942	33.1353	33.031	32.9953	32.6219			33.8357	33.479	33.3479	33.2508	32.8661
		2014-08-27 17:00:00	33.2128	32.8798	32.8184	32.8015	32.4426			34.1117	33.6776	33.5085	33.4139	32.9936
		2014-08-27 17:30:00	32.3359	32.1483	32.1884	32.2969	32.0288			34.3647	33.824	33.5936	33.4425	32.9439
		2014-08-27 18:00:00	31.7237	31.6255	31.7294	31.8995	31.6852			33.7807	33.3443	33.1782	33.0845	32.6299
		2014-08-27 18:30:00	31.0259	31.015	31.1877	31.4195	31.2773			33.4942	33.1353	33.031	32.9953	32.6219
		2014-08-27 19:00:00	30.3014	30.3373	30.5701	30.8514	30.7543			33.2128	32.8798	32.8184	32.8015	32.4426
		2014-08-27 19:30:00	29.5938	29.6461	29.8955	30.2051	30.126			32.3359	32.1483	32.1884	32.2969	32.0288
		2014-08-27 20:00:00	29.0064	29.0519	29.3203	29.6655	29.6303			31.7237	31.6255	31.7294	31.8995	31.6852
		2014-08-27 20:30:00	28.4701	28.5862	28.8765	29.2196	29.2323			31.0259	31.015	31.1877	31.4195	31.2773
		2014-08-27 21:00:00	28.706	28.8228	29.1122	29.437	29.4048			30.3014	30.3373	30.5701	30.8514	30.7543
		2014-08-27 21:30:00	27.1642	27.2382	27.5747	27.9744	28.1106			29.5938	29.6461	29.8955	30.2051	30.126
		2014-08-27 22:00:00	26.4615	26.5511	26.9047	27.3595	27.5685			29.0064	29.0519	29.3203	29.6655	29.6303
		2014-08-27 22:30:00	25.9245	26.0347	26.3534	26.7785	26.9359			28.4701	28.5862	28.8765	29.2196	29.2323
		2014-08-27 23:00:00	24.8662	25.1076	25.5798	26.067	26.2992			28.706	28.8228	29.1122	29.437	29.4048
		2014-08-27 23:30:00	24.1119	24.4465	24.8843	25.3767	25.7084			27.1642	27.2382	27.5747	27.9744	28.1106

## Sheet: 2014.10.10 wind speed of x t
				XT-0.5	XT-1	XT-2	XT-4	XT-10			TZ-0.5	TZ-1	TZ-2	TZ-4	TZ-10
			2014-10-10 00:25:00	2.77116	2.89353	3.89644	4.49406	4.88694	6.37554	0.437511	3.76878	3.65352	4.33755	4.04617	4.46348
			2014-10-10 00:55:00	2.8771	3.03545	4.00081	4.45089	4.98408			2.73024	2.70387	3.24177	3.02095	3.36658
			2014-10-10 01:25:00	3.56024	3.94357	4.85606	5.26452	5.78439			2.72919	2.64835	3.18802	2.94528	3.19957
			2014-10-10 01:55:00	3.1476	3.34304	3.98927	4.62142	4.90787			1.79873	1.78553	2.11911	1.93122	2.14954
			2014-10-10 02:25:00	2.30655	2.39827	3.51033	3.89597	4.37117			5.12752	4.66646	5.7376	5.41002	5.97901
			2014-10-10 02:55:00	3.62865	3.8092	5.1237	5.70123	6.37554			6.08294	5.44244	6.69014	6.18	6.91533
			2014-10-10 03:25:00	2.58821	2.80159	3.46999	4.09868	4.45214			6.62284	5.89906	7.27867	6.75698	7.66733
			2014-10-10 03:55:00	1.58813	1.73443	2.12844	2.322	2.64004			6.44384	5.7487	7.05858	6.59286	7.40793
			2014-10-10 04:25:00	2.60948	2.3905	3.7465	4.09553	5.05142			6.98551	6.29526	7.77037	7.24802	8.15059
			2014-10-10 04:55:00	2.83934	3.12895	3.35886	4.15695	5.00545			6.18933	5.5204	6.82694	6.39764	7.21093
			2014-10-10 05:25:00	1.97364	1.83528	2.9146	3.21904	3.9419			5.97656	5.35827	6.57687	6.18488	6.89446
			2014-10-10 05:55:00	2.25103	1.98852	3.15873	3.38455	3.9838			5.57703	5.00271	6.1036	5.73671	6.53379
			2014-10-10 06:25:00	3.81809	3.91136	4.49627	5.37133	6.19024			4.88256	4.37442	5.3716	5.03113	5.76158
			2014-10-10 06:55:00	4.10747	4.30246	4.42442	5.48753	5.8863			4.47813	4.09148	4.96717	4.6025	5.19504
			2014-10-10 07:25:00	3.23222	3.15093	4.53268	4.84054	5.49065			5.71006	5.32762	6.62706	6.16068	6.89601
			2014-10-10 07:55:00	3.48495	3.73525	4.66418	4.94649	5.21361			6.88624	6.44562	8.19345	7.6791	8.69049
			2014-10-10 08:25:00	2.93395	3.13272	3.80479	4.04288	4.41479			6.69325	6.27239	7.90163	7.38261	8.22876
			2014-10-10 08:55:00	3.50894	3.41811	4.83104	5.16451	5.71168			6.33346	5.94103	7.51675	6.94354	7.77193
			2014-10-10 09:25:00	3.80099	3.39323	5.45812	5.67996	6.30147			7.0899	6.73789	8.51259	7.85366	8.84395
			2014-10-10 09:55:00	2.96305	2.21949	4.46728	4.8554	6.03071			7.23559	6.80762	8.63275	7.96892	8.89859
			2014-10-10 10:25:00	2.9053	2.76627	3.68092	4.62041	5.75602			6.92444	6.48026	8.22654	7.54384	8.44419
			2014-10-10 10:55:00	2.69276	2.62303	3.16361	3.96238	4.82954			7.23114	6.71568	8.47328	7.81812	8.82219
			2014-10-10 11:25:00	3.33327	3.52093	3.73846	4.72595	5.25			6.62773	6.20509	7.73462	7.17495	7.87365
			2014-10-10 11:55:00	3.32616	3.54825	3.60766	4.452	5.00563			7.00839	6.48337	8.0451	7.41326	8.15748
			2014-10-10 12:25:00	2.73785	2.85	3.08597	3.52169	3.67903			7.2136	6.68503	8.27252	7.72462	8.45819
			2014-10-10 12:55:00	2.4649	2.64724	3.00138	3.39274	3.59025			6.78985	6.28793	7.91695	7.36084	8.16036
			2014-10-10 13:25:00	2.71364	2.86666	3.12739	3.52129	3.66199			6.31436	5.86152	7.3242	6.79807	7.46922
			2014-10-10 13:55:00	2.61836	2.75117	2.82454	3.36552	3.55523			6.41963	6.00966	7.50809	6.95664	7.60914
			2014-10-10 14:25:00	2.68544	2.91863	3.0908	3.64926	3.83659			6.39476	5.97368	7.39549	6.82494	7.48499
			2014-10-10 14:55:00	2.82046	3.00968	3.03298	3.67812	3.99458			5.89062	5.56592	6.86536	6.37144	7.04015
			2014-10-10 15:25:00	2.49577	2.61503	2.9833	3.56433	4.1468			5.98634	5.43689	6.63639	6.14602	6.7501
			2014-10-10 15:55:00	2.18396	1.82951	3.16179	3.3283	3.82445			5.7416	5.27299	6.52224	6.03675	6.73899
			2014-10-10 16:25:00	2.21883	1.91146	3.2326	3.42885	3.88915			5.9699	5.51173	6.73167	6.26572	6.99773
			2014-10-10 16:55:00	2.34964	2.14443	3.25191	3.43136	3.74277			5.76914	5.30941	6.56688	6.07228	6.62307
			2014-10-10 17:25:00	1.95121	1.87903	2.47845	2.7394	3.0709			5.9417	5.41846	6.60597	6.11915	6.85448
			2014-10-10 17:55:00	2.1673	2.00296	2.94441	3.19692	3.60021			5.90217	5.40091	6.60796	6.17911	6.88713
			2014-10-10 18:25:00	1.97475	1.93855	2.46035	2.73649	3.04691			5.64699	5.24567	6.51091	6.02276	6.64883
			2014-10-10 18:55:00	2.24481	2.26169	2.65273	3.10588	3.42562			5.41202	4.95451	6.12759	5.71317	6.29371
			2014-10-10 19:25:00	2.26857	2.57572	2.63228	3.31075	3.96009			5.1233	4.75708	5.85797	5.43467	6.06718
			2014-10-10 19:55:00	1.46239	1.61541	1.85708	2.34992	2.90652			5.02469	4.61028	5.69562	5.3063	5.90261
			2014-10-10 20:25:00	0.962028	0.910493	1.46967	1.73321	2.39229			4.4175	4.153	5.18104	4.82615	5.28521
			2014-10-10 20:55:00	0.783469	0.555566	1.27107	1.37327	1.7912			3.86339	3.6302	4.53721	4.20496	4.67024
			2014-10-10 21:25:00	0.335557	0.378926	0.662291	1.15228	1.81955			3.82675	3.61266	4.5512	4.19319	4.75019
			2014-10-10 21:55:00	0.394115	0.167673	0.695201	1.08164	1.7846			4.13745	3.92713	4.91054	4.53654	5.05246
			2014-10-10 22:25:00	0.167567	0.0951374	0.120093	0.818437	1.35908			3.31572	3.14072	3.98754	3.67484	4.16743
			2014-10-10 22:55:00	0	0	0	0.57495	1.1727			3.26153	3.08009	3.93357	3.6513	4.12213
			2014-10-10 23:25:00	0	0	0	0.0648719	0.641519			2.73652	2.64568	3.30617	3.09341	3.47229
			2014-10-10 23:55:00	0.0659273	0.103966	0.137918	0.218131	0.437511			2.17796	2.17241	2.68299	2.51931	2.87532

## Sheet: 2014.10.10 temperature of x t
				XT-0.5	XT-1	XT-2	XT-4	XT-10			TZ-0.5	TZ-1	TZ-2	TZ-4	TZ-10
			2014-10-10 00:25:00	10.5354	10.4582	10.6123	10.8649	10.6426			16.6673	16.8245	17.1115	17.3172	17.3504
			2014-10-10 00:55:00	9.49873	9.40069	9.57453	9.82982	9.60753			16.6786	16.8313	17.1467	17.3477	17.3886
			2014-10-10 01:25:00	8.98032	8.93563	9.10042	9.36741	9.16736			16.2233	16.3666	16.6558	16.8341	16.8269
			2014-10-10 01:55:00	8.61791	8.55832	8.7022	8.94828	8.7137			15.5053	15.6256	15.8886	16.0466	16.0258
			2014-10-10 02:25:00	8.84509	8.81624	8.99576	9.28222	9.07874			14.8336	14.9317	15.1717	15.3131	15.2607
			2014-10-10 02:55:00	8.25242	8.2643	8.52039	8.85606	8.72085			14.056	14.1545	14.3907	14.5415	14.4895
			2014-10-10 03:25:00	7.37232	7.33385	7.50772	7.78285	7.57711			13.082	13.1644	13.3907	13.5204	13.4508
			2014-10-10 03:55:00	6.91938	6.81453	7.02027	7.2988	7.03592			12.2792	12.346	12.5724	12.7006	12.6343
			2014-10-10 04:25:00	6.56654	6.50638	6.66253	6.92996	6.68384			11.582	11.6435	11.867	11.9855	11.9179
			2014-10-10 04:55:00	6.71635	6.64996	6.81896	7.06077	6.8299			11.0673	11.138	11.351	11.4758	11.41
			2014-10-10 05:25:00	6.70781	6.6299	6.77628	7.03244	6.78647			10.9363	11.0142	11.2379	11.372	11.3171
			2014-10-10 05:55:00	6.53445	6.45333	6.58331	6.8191	6.57953			11.0414	11.1297	11.3457	11.4906	11.4387
			2014-10-10 06:25:00	6.21293	6.11314	6.26425	6.50326	6.24915			11.1711	11.256	11.4994	11.6465	11.6177
			2014-10-10 06:55:00	6.33503	6.26674	6.41463	6.65496	6.41426			11.5303	11.6384	11.8916	12.0518	12.0406
			2014-10-10 07:25:00	6.30786	6.249	6.40011	6.64289	6.39388			11.8188	11.9248	12.174	12.3361	12.3068
			2014-10-10 07:55:00	6.23297	6.18109	6.3322	6.5763	6.33163			10.9745	11.066	11.2842	11.4295	11.3785
			2014-10-10 08:25:00	6.21033	6.15053	6.30881	6.57102	6.33767			10.513	10.6051	10.8226	10.9697	10.9233
			2014-10-10 08:55:00	6.44312	6.40124	6.55008	6.80626	6.57875			10.2733	10.3552	10.5706	10.7167	10.6669
			2014-10-10 09:25:00	5.96264	5.9019	6.03188	6.28711	6.03244			10.1473	10.2149	10.4207	10.5451	10.4938
			2014-10-10 09:55:00	6.0415	5.95132	6.07753	6.31748	6.05168			10.084	10.136	10.3192	10.436	10.3594
			2014-10-10 10:25:00	6.34594	6.23445	6.34745	6.56514	6.29557			10.1032	10.1294	10.2985	10.3921	10.2975
			2014-10-10 10:55:00	6.72106	6.5877	6.68843	6.91441	6.63372			10.0294	10.0347	10.1968	10.2836	10.1656
			2014-10-10 11:25:00	6.83657	6.73378	6.86373	7.09477	6.83807			10.1055	10.0691	10.2136	10.2832	10.1357
			2014-10-10 11:55:00	7.06569	6.95593	7.07097	7.30068	7.04212			10.2968	10.2066	10.3166	10.3685	10.1989
			2014-10-10 12:25:00	7.56745	7.37415	7.43921	7.6146	7.31211			10.569	10.4241	10.4932	10.5055	10.2828
			2014-10-10 12:55:00	7.95695	7.74838	7.79119	7.95262	7.66315			10.8769	10.6986	10.7455	10.7416	10.4905
			2014-10-10 13:25:00	8.60208	8.38125	8.41463	8.56964	8.25547			11.4965	11.2963	11.2597	11.2299	10.9512
			2014-10-10 13:55:00	8.94718	8.72975	8.76256	8.91814	8.62056			11.8225	11.5779	11.513	11.4434	11.1478
			2014-10-10 14:25:00	9.20644	8.95356	8.96205	9.09971	8.77555			12.2509	11.9831	11.8862	11.8187	11.4965
			2014-10-10 14:55:00	9.68638	9.35189	9.3072	9.42298	9.07811			12.4976	12.2296	12.1536	12.0846	11.7854
			2014-10-10 15:25:00	9.71013	9.37755	9.31684	9.41413	9.07948			12.9701	12.6681	12.5568	12.4635	12.1076
			2014-10-10 15:55:00	9.65391	9.38584	9.36095	9.44805	9.11117			12.9821	12.6989	12.5733	12.4647	12.1162
			2014-10-10 16:25:00	10.3591	9.99513	9.89484	9.85355	9.48859			12.6915	12.4207	12.3351	12.2339	11.8998
			2014-10-10 16:55:00	10.7993	10.1985	10.09	10.0711	9.66544			12.6301	12.4014	12.3318	12.2623	11.9921
			2014-10-10 17:25:00	10.9392	10.3787	10.3518	10.316	9.92416			12.4083	12.209	12.1849	12.1281	11.8192
			2014-10-10 17:55:00	10.9327	10.3885	10.3632	10.3351	9.9718			11.935	11.8177	11.8605	11.8613	11.6414
			2014-10-10 18:25:00	10.923	10.4157	10.4879	10.5147	10.1864			11.912	11.8209	11.8756	11.8968	11.6963
			2014-10-10 18:55:00	10.5842	10.2738	10.3466	10.4285	10.1436			11.6326	11.5943	11.7114	11.7728	11.6224
			2014-10-10 19:25:00	10.0965	9.92011	10.0266	10.183	9.95252			11.2124	11.2356	11.4067	11.5	11.4053
			2014-10-10 19:55:00	9.32416	9.31229	9.45929	9.72841	9.54297			10.93	10.9843	11.1884	11.3133	11.2471
			2014-10-10 20:25:00	8.50581	8.57217	8.73768	9.08172	8.97182			10.5143	10.6166	10.8496	10.9952	10.9703
			2014-10-10 20:55:00	7.76783	7.88248	8.04747	8.40234	8.33917			10.2737	10.3858	10.6246	10.7733	10.7573
			2014-10-10 21:25:00	6.8898	7.02633	7.25526	7.65109	7.72558			10.0074	10.1232	10.3672	10.5328	10.5221
			2014-10-10 21:55:00	6.24083	6.4115	6.67421	7.12023	7.24413			9.6317	9.7634	10.0145	10.1783	10.1824
			2014-10-10 22:25:00	5.64602	5.89351	6.18515	6.67239	6.77029			9.19039	9.32756	9.58095	9.75113	9.76491
			2014-10-10 22:55:00	4.4595	4.95469	5.47534	6.1073	6.26821			8.78559	8.92993	9.1837	9.36049	9.39275
			2014-10-10 23:25:00	3.59069	4.08817	4.70073	5.2865	5.62797			8.39913	8.55425	8.80637	8.98715	9.02905
			2014-10-10 23:55:00	2.89659	3.35908	3.93555	4.4888	5.27944			7.97675	8.14284	8.40651	8.60884	8.66886

## Sheet: 2015.1.5 wind speed of x t
					XT-0.5	XT-1	XT-2	XT-4	XT-10			TZ-0.5	TZ-1	TZ-2	TZ-4	TZ-10
				2015-01-05	0.723712	0.814394	1.03462	1.03164	1.36122			1.29852	0.562884	0.789502	0.629944	1.28428
				2015-01-05 00:30:00	0.170556	0.319847	0	0.197284	1.21293			1.44789	0.842544	1.06752	1.09262	1.47061
				2015-01-05 01:00:00	0.172988	0.245964	0.280273	0.551947	1.6473			1.60247	1.0502	1.35335	1.36845	1.62874
				2015-01-05 01:30:00	0.352548	0.464168	0.68298	1.28281	2.30759			1.56748	1.2614	1.72157	1.79131	2.53619
				2015-01-05 02:00:00	0.0589844	0.106416	0.0698428	0.462606	1.61965			1.60823	1.42841	1.83683	1.84927	2.58172
				2015-01-05 02:30:00	0	0.0429904	0	0.480661	1.53114			0.363638	0.604459	0.857734	0.773257	1.13086
				2015-01-05 03:00:00	0.14435	0.229548	0.107061	0.564901	1.40051			1.8225	0.376512	0.839319	0.559149	0.915389
				2015-01-05 03:30:00	0.185061	0.287025	0.214207	0.650517	1.49654			1.66725	0.822149	1.12021	0.900255	1.3478
				2015-01-05 04:00:00	0.0523217	0.246103	0.00719863	0.729408	1.59642			1.77437	0.502589	0.7729	0.782999	1.3971
				2015-01-05 04:30:00	0.0702052	0.263101	0.0216008	0.501714	1.35028			1.8551	0.611878	0.897557	0.811125	1.54084
				2015-01-05 05:00:00	0.0453787	0.0696026	0	0.461111	1.54977			1.7506	0.465096	0.755311	0.0381008	0.849702
				2015-01-05 05:30:00	0.0726446	0.0996956	0	0.356144	1.23347			0.565025	0	0.0953595	0.00172209	0.596056
				2015-01-05 06:00:00	0.200057	0.216223	0	0.107738	1.17616			0.0696591	0	0.546245	0.0986254	0.745201
				2015-01-05 06:30:00	0.100031	0.0949189	0	0.102157	1.32744			0.565124	0.195536	0.829885	0.477806	0.895289
				2015-01-05 07:00:00	0	0.026494	0	0	1.30857			1.57087	0.699989	1.006	0.888673	0.912273
				2015-01-05 07:30:00	0.173061	0.205606	0.122004	0.065237	0.798661			0.807389	0.565437	0.773551	0.542747	0.966182
				2015-01-05 08:00:00	0.126911	0.191669	0.0702923	0.0731572	0			1.82306	0.465489	0.656573	0.516672	0.921659
				2015-01-05 08:30:00	0.357267	0.348882	0.0783939	0.401426	0.0224297			1.77942	0.620806	0.914756	0.591352	0.685561
				2015-01-05 09:00:00	0.0950864	0.103085	0	0	0.825327			1.8441	0.895234	1.04958	0.787521	1.09795
				2015-01-05 09:30:00	0.210827	0.18722	0	0.361553	0.834852			1.69885	0.70162	0.886849	0.884843	0.971712
				2015-01-05 10:00:00	0.433742	0.45606	0.301333	0.436749	0.445811			1.65455	0.772361	0.867288	0.769266	0.744119
				2015-01-05 10:30:00	0.182837	0.172781	0.0360139	0.114736	0.158878			1.52473	0.856758	1.03159	0.918244	0.972437
				2015-01-05 11:00:00	0.238541	0.256756	0.0721107	0.278354	0.223479			1.58014	0.81656	0.917774	0.543483	0.820627
				2015-01-05 11:30:00	0.791074	0.839155	0.846831	1.00095	0.543014			1.25844	1.46373	1.78798	1.09261	1.71757
				2015-01-05 12:00:00	0.776733	0.812606	0.90638	1.05334	0.685514			1.39558	1.77931	2.22594	2.00007	2.06514
				2015-01-05 12:30:00	1.45934	1.36045	1.62321	1.72723	1.27674			0.908469	1.36023	1.70358	1.48321	1.59787
				2015-01-05 13:00:00	1.199	1.1739	1.42201	1.46442	1.34028			1.58942	1.65472	2.08935	1.87637	1.95299
				2015-01-05 13:30:00	0.859128	0.892838	0.931017	1.02472	1.16048			2.09373	2.03738	2.55907	2.27746	2.44536
				2015-01-05 14:00:00	1.40687	1.41109	1.82938	1.87954	1.98493			1.68697	1.7882	2.27657	2.02272	2.14976
				2015-01-05 14:30:00	1.18967	1.19456	1.7512	1.79357	1.83227			1.76226	1.85371	2.33076	2.07958	2.19062
				2015-01-05 15:00:00	1.30493	1.2372	1.66586	1.74286	1.87106			1.01786	1.19338	1.52236	1.26388	1.38637
				2015-01-05 15:30:00	1.40376	1.33541	1.93316	2.01816	2.15056			0.694408	0.687461	1.00687	0.634255	0.696338
				2015-01-05 16:00:00	1.18351	1.22432	1.63855	1.68123	1.77366			0.92025	0.406789	0.588486	0.129616	0.283992
				2015-01-05 16:30:00	0.641849	0.764253	0.845932	0.901776	0.980438			0.919216	0.803675	0.940311	0.434364	0.707522
				2015-01-05 17:00:00	1.24119	1.26873	1.62526	1.69803	1.76343			0.892889	0.954972	1.11377	0.80613	0.922413
				2015-01-05 17:30:00	1.28672	1.37334	1.67706	1.82899	2.00165			0.754113	0.942477	1.16446	0.828502	0.862919
				2015-01-05 18:00:00	1.51347	1.62607	1.98452	2.24433	2.61885			1.31214	1.39466	1.74156	1.52946	1.64939
				2015-01-05 18:30:00	1.09173	1.18301	1.57957	1.82966	2.17872			0.847401	0.466378	0.706382	0.19614	0.305087
				2015-01-05 19:00:00	1.25452	1.34957	1.7058	1.91846	2.32635			0.844066	0.379254	0.793295	0.229129	0.936149
				2015-01-05 19:30:00	1.12248	1.29672	1.59013	1.85689	2.40713			1.38225	1.38799	2.17619	2.09157	2.59083
				2015-01-05 20:00:00	0.588905	0.566849	0.66058	0.770731	1.68417			0.767981	1.01865	1.68803	1.5228	2.03205
				2015-01-05 20:30:00	1.3589	1.36667	1.98028	2.31807	3.04219			1.05805	0.521161	0.96095	0.875356	1.18802
				2015-01-05 21:00:00	1.13659	1.19678	1.56519	1.86884	2.45459			1.14083	0.586076	0.905308	0.727878	0.804441
				2015-01-05 21:30:00	0.547546	0.650049	0.758232	1.03509	1.57991			0.389401	0.246303	0.601877	0.261784	0
				2015-01-05 22:00:00	0.0362659	0.302797	0.0706968	0.307313	0.365508			0.13673	0.425568	0.796671	0.648181	0.573654
				2015-01-05 22:30:00	0.464503	0.542299	0.384465	0.695749	0.562653			0.883777	0.453056	0.895234	0.670896	0.859438
				2015-01-05 23:00:00	1.13547	1.23191	1.49985	1.6513	1.83409			1.64345	0.402832	0.604793	0.407954	0.202399
				2015-01-05 23:30:00	0.354278	0.4353	0.231329	0.364564	1.15732			1.60447	0.410127	0.732804	0.505054	0.739219

## Sheet: 2015.1.5 temperature of x t
					XT-0.5	XT-1	XT-2	XT-4	XT-10			TZ-0.5	TZ-1	TZ-2	TZ-4	TZ-10
				2015-01-05	-32.2426	-32.129	-31.9505	-31.7232	-31.5912			-7.12958	-6.88739	-6.61892	-6.36294	-5.95702
				2015-01-05 00:30:00	-32.3259	-32.1514	-31.9734	-31.7469	-31.5796			-8.09415	-7.79653	-7.46657	-7.1319	-6.74523
				2015-01-05 01:00:00	-32.4336	-32.2309	-32.0439	-31.8397	-31.7884			-8.78793	-8.5103	-8.15172	-7.72789	-7.36534
				2015-01-05 01:30:00	-32.1676	-32.0244	-31.8457	-31.6124	-31.5428			-9.52281	-9.19842	-8.78778	-8.30279	-7.66648
				2015-01-05 02:00:00	-32.3321	-32.1078	-31.8934	-31.6712	-31.5613			-9.78636	-9.50448	-9.14334	-8.76384	-8.10095
				2015-01-05 02:30:00	-32.6662	-32.3455	-32.1284	-31.9085	-31.7816			-10.7713	-10.4643	-10.0954	-9.69959	-9.25953
				2015-01-05 03:00:00	-32.6825	-32.4024	-32.1721	-31.8196	-31.5969			-10.4885	-10.1561	-9.86625	-9.53611	-9.42884
				2015-01-05 03:30:00	-32.5885	-32.451	-32.2644	-31.9484	-31.7493			-11.0337	-10.7377	-10.4696	-10.2534	-10.0793
				2015-01-05 04:00:00	-32.4707	-32.2018	-31.9753	-31.6858	-31.5396			-12.2311	-11.7915	-11.2764	-10.8847	-10.4636
				2015-01-05 04:30:00	-33.0779	-32.7528	-32.4584	-32.046	-31.7257			-12.386	-11.9743	-11.4916	-11.0551	-10.4908
				2015-01-05 05:00:00	-33.2658	-32.9277	-32.6407	-32.3136	-31.8202			-12.9395	-12.3821	-11.8034	-11.4093	-11.1325
				2015-01-05 05:30:00	-33.2898	-32.9351	-32.5667	-32.188	-31.7935			-12.8554	-12.5257	-12.1198	-11.7335	-11.174
				2015-01-05 06:00:00	-33.5334	-33.321	-32.996	-32.4419	-31.9212			-14.5943	-14.1317	-13.4656	-12.7137	-11.4774
				2015-01-05 06:30:00	-33.7779	-33.6434	-33.4195	-32.8785	-32.0292			-15.2496	-14.6145	-13.8812	-12.8597	-11.7308
				2015-01-05 07:00:00	-33.5354	-33.3287	-33.052	-32.5789	-31.8126			-14.5749	-14.0435	-13.2837	-12.5624	-11.9532
				2015-01-05 07:30:00	-33.6709	-33.4965	-33.215	-32.5961	-31.8567			-15.6159	-15.0957	-14.2673	-13.3248	-12.5047
				2015-01-05 08:00:00	-33.0969	-32.9429	-32.7235	-32.3541	-31.745			-14.6343	-14.2434	-13.7608	-13.3224	-12.8858
				2015-01-05 08:30:00	-32.9946	-32.9061	-32.7121	-32.331	-31.8886			-14.4128	-13.8303	-13.3377	-12.8852	-12.5901
				2015-01-05 09:00:00	-32.6584	-32.6497	-32.5442	-32.3019	-32.1516			-15.597	-15.265	-14.7017	-13.9517	-12.9929
				2015-01-05 09:30:00	-32.0295	-32.0811	-32.0374	-31.9149	-31.9064			-15.6496	-15.349	-14.8432	-14.1892	-13.1262
				2015-01-05 10:00:00	-31.7575	-31.8282	-31.773	-31.6437	-31.6791			-15.0685	-14.8006	-14.4304	-14.0109	-13.3903
				2015-01-05 10:30:00	-30.2322	-30.3356	-30.3076	-30.1959	-30.2613			-14.1851	-14.0249	-13.8207	-13.5257	-13.2285
				2015-01-05 11:00:00	-30.4033	-30.5309	-30.5105	-30.4152	-30.5003			-13.4715	-13.3337	-13.1662	-13.0066	-12.7995
				2015-01-05 11:30:00	-29.5176	-29.7094	-29.643	-29.5794	-29.6695			-11.8621	-11.7671	-11.7088	-11.6342	-11.6618
				2015-01-05 12:00:00	-29.2289	-29.3823	-29.3674	-29.2801	-29.4025			-10.2219	-10.1264	-10.1487	-10.2	-10.2649
				2015-01-05 12:30:00	-29.0596	-29.2176	-29.177	-29.0975	-29.1817			-9.04486	-9.04221	-9.12092	-9.0827	-9.17484
				2015-01-05 13:00:00	-28.4825	-28.6158	-28.5659	-28.4878	-28.5842			-8.15098	-8.19165	-8.26524	-8.19449	-8.31953
				2015-01-05 13:30:00	-28.2434	-28.3459	-28.2872	-28.197	-28.2721			-7.10226	-7.17583	-7.24278	-7.19266	-7.32051
				2015-01-05 14:00:00	-28.2969	-28.393	-28.3382	-28.2303	-28.3158			-6.06561	-6.1335	-6.2135	-6.19212	-6.30597
				2015-01-05 14:30:00	-29.2081	-29.209	-29.1817	-29.0924	-29.1428			-5.26837	-5.33776	-5.42889	-5.44288	-5.57277
				2015-01-05 15:00:00	-28.9849	-28.9813	-28.9869	-28.9022	-28.9237			-4.69229	-4.7698	-4.83786	-4.80175	-4.91235
				2015-01-05 15:30:00	-28.7482	-28.6779	-28.604	-28.467	-28.4905			-4.10663	-4.18507	-4.17033	-4.10928	-4.19528
				2015-01-05 16:00:00	-29.7766	-29.6617	-29.5665	-29.401	-29.3938			-3.87776	-3.84922	-3.7602	-3.77948	-3.8135
				2015-01-05 16:30:00	-29.6453	-29.4533	-29.2553	-28.9805	-28.9506			-3.07504	-3.02458	-3.09092	-3.15158	-3.15744
				2015-01-05 17:00:00	-29.762	-29.5113	-29.2441	-28.932	-28.851			-2.83768	-2.88756	-2.95066	-3.05836	-3.07045
				2015-01-05 17:30:00	-30.8	-30.5476	-30.2947	-29.9939	-29.8039			-3.16006	-3.19822	-3.18443	-3.16516	-3.30138
				2015-01-05 18:00:00	-30.5453	-30.3663	-30.1984	-29.9275	-29.6353			-3.72971	-3.752	-3.67964	-3.59424	-3.69437
				2015-01-05 18:30:00	-29.8404	-29.7185	-29.5547	-29.2846	-29.0891			-3.85849	-3.8224	-3.68331	-3.60187	-3.66253
				2015-01-05 19:00:00	-29.984	-29.8857	-29.7225	-29.4652	-29.3404			-4.49838	-4.31298	-4.06615	-3.87054	-3.82102
				2015-01-05 19:30:00	-30.5981	-30.5488	-30.4362	-30.2399	-30.1515			-5.36164	-5.14749	-4.79913	-4.40635	-4.08218
				2015-01-05 20:00:00	-30.5737	-30.525	-30.3986	-30.1764	-30.0304			-5.7118	-5.51026	-5.16901	-4.75706	-4.44568
				2015-01-05 20:30:00	-30.1895	-30.1787	-30.0637	-29.8593	-29.7973			-6.36929	-6.12937	-5.7244	-5.20676	-4.72919
				2015-01-05 21:00:00	-30.4828	-30.4475	-30.3394	-30.1524	-29.9974			-6.8669	-6.57517	-6.23959	-5.91459	-5.51454
				2015-01-05 21:30:00	-30.6196	-30.5423	-30.3878	-30.1798	-30.0172			-7.56453	-7.23007	-6.74549	-6.28701	-5.99112
				2015-01-05 22:00:00	-30.8218	-30.7168	-30.555	-30.3212	-30.1143			-8.65957	-8.31217	-7.76752	-7.04131	-6.15114
				2015-01-05 22:30:00	-30.8679	-30.6977	-30.5244	-30.2495	-29.9661			-9.00105	-8.56473	-8.06694	-7.59392	-6.91059
				2015-01-05 23:00:00	-29.9538	-29.8807	-29.721	-29.4863	-29.2004			-9.42993	-8.97803	-8.51763	-7.98137	-7.50375
				2015-01-05 23:30:00	-30.1191	-30.0843	-29.956	-29.7374	-29.5862			-9.75926	-9.45752	-8.9997	-8.3894	-7.80596

## Sheet: 2015.4.15 wind speed of x t
								XT-0.5	XT-1	XT-2	XT-4	XT-10			TZ-0.5	TZ-1	TZ-2	TZ-4	TZ-10
							2015-04-15 00:25:00	0.110694	0.157846	0.0398062	0.651985	1.24659			1.44111	0.692412	0.761221	0.195143	0.471664
							2015-04-15 00:55:00	0.0408787	0.208049	0.0648903	0.532186	1.26689			1.70696	0.612239	0.62699	0.201707	0.120463
							2015-04-15 01:25:00	0.0404345	0.128858	0.0117734	0.0217734	0.544636			1.67704	0.652648	0.250777	0.422277	0.236302
							2015-04-15 01:55:00	0.0445996	0.181067	0.0220459	0.213731	1.07211			1.54594	0.719729	0.588507	0.605161	0.250963
							2015-04-15 02:25:00	0.110691	0.157071	0.0307264	0.384071	0.703308			1.54367	0.335353	0.0636023	0.0859699	0.25148
							2015-04-15 02:55:00	0.00172209	0	0.0292277	0.470429	0.763969			1.61024	0.574483	0.461737	0	0
							2015-04-15 03:25:00	0.0199807	0.0742064	0.0206115	0.154846	0.856863			1.57726	0.511407	0.416308	0	0
							2015-04-15 03:55:00	0.0292109	0.194505	0.0300526	0.0330021	0.239013			1.5717	0.462624	0.515669	0.162831	0.237368
							2015-04-15 04:25:00	0.0294315	0.192161	0.0315631	0.136038	0.294893			1.58337	0.411726	0.222397	0	0.321991
							2015-04-15 04:55:00	0.0378077	0.123692	0.0391705	0.123949	0.713459			0.548998	0.449258	0.218637	0	0.161717
							2015-04-15 05:25:00	0.0271601	0.0813715	0.0279295	0.0248358	0.988883			1.59641	0.42133	0.0899778	0	0.330489
							2015-04-15 05:55:00	0.0350462	0.0859225	0.00950512	0.490513	1.35631			1.52706	0.426154	0.209936	0	0
							2015-04-15 06:25:00	0.031937	0.0887004	0.0295833	0.213766	1.12818			1.58719	0.636832	0.351383	0	0.448043
							2015-04-15 06:55:00	0.0485426	0.0700924	0.0202957	0.366331	1.39452			1.77347	0.549606	0.197262	0	0.138787
							2015-04-15 07:25:00	0.390605	0.496112	0.0345609	0.847536	1.81505			1.72084	0.569652	0.548552	0	0.0967502
							2015-04-15 07:55:00	0.446455	0.545193	0.0347571	1.04154	1.87606			1.72273	0.457097	0.254524	0	0.0588169
							2015-04-15 08:25:00	0.219776	0.261146	0.0323326	0.0523326	1.02393			1.77742	0.472013	0.435516	0	0.386918
							2015-04-15 08:55:00	0.107196	0.140301	0.0326483	0.074381	0.935268			1.63378	0.44568	0.288206	0	0.611762
							2015-04-15 09:25:00	0.0852016	0.123248	0.0228449	0.168232	1.29608			1.69281	0.347003	0.165921	0	1.15347
							2015-04-15 09:55:00	0.203065	0.257269	0.0114193	0.192259	0.778143			1.61746	0.673517	0.949705	0.847868	1.62985
							2015-04-15 10:25:00	0.963805	1.01178	1.01909	1.25396	1.40541			1.70847	1.77887	2.00562	1.83461	1.88236
							2015-04-15 10:55:00	1.14392	1.10483	1.46258	1.60823	1.82427			2.94778	2.89398	3.29307	3.06765	3.23
							2015-04-15 11:25:00	1.69647	1.63051	2.21584	2.34832	2.43611			4.19586	4.05039	4.67389	4.3873	4.66713
							2015-04-15 11:55:00	1.84194	1.58743	2.57544	2.73559	3.0063			4.37486	4.18253	4.88163	4.57141	4.8217
							2015-04-15 12:25:00	1.61053	1.56344	2.09193	2.21419	2.3874			4.39463	4.20696	4.89727	4.67224	5.04157
							2015-04-15 12:55:00	1.41043	1.44085	1.76174	1.87774	1.98113			5.09354	4.81971	5.6951	5.46132	6.07873
							2015-04-15 13:25:00	1.37955	1.41709	1.6414	1.83989	1.93055			4.91831	4.6296	5.3192	5.22213	5.64965
							2015-04-15 13:55:00	1.77248	1.79131	2.13414	2.34331	2.48844			4.34199	4.04706	4.54396	4.51944	4.94674
							2015-04-15 14:25:00	1.64162	1.77931	1.93977	2.16711	2.28891			3.95845	3.70993	4.29856	4.22429	4.57674
							2015-04-15 14:55:00	1.8506	1.96342	2.18003	2.44562	2.5817			4.13723	3.82897	4.39397	4.38863	4.78018
							2015-04-15 15:25:00	1.73601	1.8204	2.2499	2.41941	2.58915			4.04617	3.72792	4.2419	4.17432	4.63093
							2015-04-15 15:55:00	2.25569	2.38562	2.99689	3.30988	3.52839			4.52233	4.14966	4.68931	4.61294	5.074
							2015-04-15 16:25:00	2.68099	2.7967	3.39838	3.69149	3.84318			4.54343	4.155	4.48206	4.61139	4.9192
							2015-04-15 16:55:00	2.1844	2.31655	2.55567	2.88871	2.98646			4.40595	4.03151	4.5679	4.50545	4.92586
							2015-04-15 17:25:00	2.01872	2.20572	2.33937	2.78572	2.95282			4.56031	4.13745	4.56656	4.68179	5.09687
							2015-04-15 17:55:00	2.53131	2.64413	3.04192	3.43355	3.55077			4.80394	4.3662	4.99256	4.92542	5.40091
							2015-04-15 18:25:00	2.49622	2.67322	3.21596	3.6215	3.7944			4.70311	4.28692	4.9047	4.84547	5.28676
							2015-04-15 18:55:00	2.00918	2.08757	2.49309	2.76159	2.90231			4.82548	4.36776	5.07204	4.94297	5.44977
							2015-04-15 19:25:00	1.6776	1.74933	2.29309	2.55807	2.71164			4.35798	3.97533	4.66134	4.52588	5.00848
							2015-04-15 19:55:00	2.10534	2.21172	2.87473	3.13036	3.35273			4.36864	3.98021	4.66304	4.58718	5.09065
							2015-04-15 20:25:00	2.13665	2.2568	3.04741	3.54061	3.82469			4.33711	3.94868	4.67999	4.51656	5.04735
							2015-04-15 20:55:00	1.45906	1.5992	1.99199	2.42918	2.84205			3.75346	3.45075	4.14818	4.03529	4.63293
							2015-04-15 21:25:00	2.21772	2.2708	2.49201	2.92672	3.24506			3.13761	2.93329	3.53987	3.44453	4.08437
							2015-04-15 21:55:00	1.10816	1.23742	1.60753	1.89105	2.33505			2.6097	2.45024	2.97768	2.88176	3.49961
							2015-04-15 22:25:00	0.875635	0.980017	1.41703	1.816	2.3383			2.32832	2.21927	2.6973	2.68988	3.399
							2015-04-15 22:55:00	1.10283	1.23187	1.66525	2.09823	2.73586			2.54952	2.40782	2.91438	2.91641	3.59711
							2015-04-15 23:25:00	1.4755	1.68404	1.78409	2.29361	3.0524			2.39028	2.31033	2.71721	2.7454	3.3708
							2015-04-15 23:55:00	1.32425	1.47461	1.891	2.32791	2.99951			2.41893	2.40027	2.91888	2.86599	3.46719

## Sheet: 2015.4.15 temperature of x t
								XT-0.5	XT-1	XT-2	XT-4	XT-10			TZ-0.5	TZ-1	TZ-2	TZ-4	TZ-10
							2015-04-15 00:25:00	20.9929	21.0049	21.1729	21.5254	21.3666			18.1184	18.629	19.52	20.4096	21.5339
							2015-04-15 00:55:00	20.5074	20.5541	20.7135	21.0399	20.8708			17.047	17.8123	18.9692	19.9917	20.8964
							2015-04-15 01:25:00	19.5526	19.5917	19.7475	20.0787	19.8946			16.0905	16.6794	17.6391	18.6727	20.0723
							2015-04-15 01:55:00	18.5322	18.5531	18.6997	19.0357	18.8183			15.4894	16.0409	16.8922	17.8466	19.1205
							2015-04-15 02:25:00	18.2808	18.2879	18.4302	18.7634	18.5405			14.0381	14.421	15.1209	16.332	18.5056
							2015-04-15 02:55:00	17.58	17.5485	17.6753	18.0095	17.7834			12.8247	13.535	14.5245	15.2842	16.7788
							2015-04-15 03:25:00	17.4613	17.4276	17.5853	17.9766	17.796			11.9881	12.7872	13.7705	14.5689	16.0525
							2015-04-15 03:55:00	17.9831	17.9452	18.1502	18.5129	18.3825			11.1899	11.83	12.8554	14.0409	16.0313
							2015-04-15 04:25:00	17.7497	17.7516	17.9106	18.2441	18.0399			10.6708	11.3002	12.3098	13.4837	16.0446
							2015-04-15 04:55:00	17.2922	17.2841	17.4452	17.7714	17.5588			10.3658	10.952	11.7869	12.5239	14.2224
							2015-04-15 05:25:00	16.9497	16.934	17.0812	17.4126	17.1827			9.7534	10.3689	11.3166	12.6384	14.3763
							2015-04-15 05:55:00	16.6577	16.6157	16.7791	17.1015	16.8793			9.77019	10.2483	10.949	11.7375	13.6299
							2015-04-15 06:25:00	16.4841	16.4193	16.5812	16.9066	16.6874			9.50782	9.99631	10.7831	11.675	13.4576
							2015-04-15 06:55:00	16.5376	16.4994	16.6537	16.9967	16.7724			9.31232	9.79355	10.6244	11.2991	13.2027
							2015-04-15 07:25:00	16.3299	16.2704	16.4324	16.7528	16.5359			8.72517	9.22797	9.99349	11.1705	12.804
							2015-04-15 07:55:00	16.0436	15.9786	16.1134	16.4552	16.201			8.52178	8.98287	9.8824	11.4597	13.67
							2015-04-15 08:25:00	15.9249	15.8341	15.9615	16.2779	16.0355			8.34606	8.94758	9.84352	10.7833	12.7692
							2015-04-15 08:55:00	15.9931	15.8957	16.0125	16.315	16.0589			9.46736	10.0774	11.3636	12.813	14.0854
							2015-04-15 09:25:00	16.1844	16.0602	16.1373	16.413	16.1284			11.0325	11.3605	12.1985	13.1578	15.2356
							2015-04-15 09:55:00	16.1499	16.0493	16.1011	16.3785	16.0827			15.013	15.2268	15.8975	16.6635	17.3054
							2015-04-15 10:25:00	16.1134	15.9788	16.0365	16.302	16.0093			18.9361	18.7498	18.9791	19.0974	18.9278
							2015-04-15 10:55:00	16.2472	16.0783	16.0853	16.3335	16.0146			21.8945	21.5823	21.7128	21.7435	21.5364
							2015-04-15 11:25:00	16.7339	16.566	16.4734	16.6764	16.3404			23.1305	22.9526	23.0446	23.0772	22.866
							2015-04-15 11:55:00	16.9546	16.7611	16.6426	16.8617	16.4962			23.9119	23.8119	23.9812	24.0535	23.8799
							2015-04-15 12:25:00	16.6012	16.3925	16.3007	16.5208	16.1592			25.8028	25.4923	25.5422	25.5691	25.2721
							2015-04-15 12:55:00	16.5973	16.3218	16.2743	16.4763	16.1236			28.4138	27.9101	27.7794	27.7011	27.24
							2015-04-15 13:25:00	16.7975	16.4768	16.4365	16.6219	16.2955			29.4161	28.9527	28.7182	28.6244	28.1699
							2015-04-15 13:55:00	16.8553	16.4742	16.4776	16.6726	16.3451			29.4407	29.1014	28.9315	28.8346	28.4746
							2015-04-15 14:25:00	16.8945	16.6951	16.6539	16.7905	16.4941			29.5868	29.3072	29.1987	29.1309	28.7759
							2015-04-15 14:55:00	16.8974	16.6163	16.5648	16.712	16.4007			29.3418	29.1384	29.1066	29.0967	28.8172
							2015-04-15 15:25:00	17.1593	16.9315	16.8812	17.0443	16.7879			29.5008	29.2939	29.2656	29.2205	28.9235
							2015-04-15 15:55:00	16.9938	16.7781	16.747	16.967	16.6684			30.5623	30.1688	29.9434	29.7874	29.3424
							2015-04-15 16:25:00	17.097	16.9018	16.8666	17.0748	16.7835			30.9509	30.5156	30.2447	30.0866	29.6686
							2015-04-15 16:55:00	17.813	17.6146	17.5451	17.6892	17.3806			31.0916	30.678	30.4678	30.3365	29.9272
							2015-04-15 17:25:00	18.5809	18.3307	18.1595	18.2295	17.9228			30.9729	30.5643	30.3646	30.224	29.8164
							2015-04-15 17:55:00	18.7711	18.4931	18.3616	18.4464	18.1606			30.8043	30.49	30.3491	30.2524	29.8868
							2015-04-15 18:25:00	19.2633	18.9963	18.8921	18.9377	18.6396			30.7475	30.4898	30.402	30.3309	29.9805
							2015-04-15 18:55:00	19.5254	19.2158	19.1151	19.1697	18.8516			30.2651	30.082	30.0869	30.0499	29.7478
							2015-04-15 19:25:00	19.2686	19.004	18.945	19.0676	18.7138			29.4234	29.3711	29.4868	29.5442	29.3574
							2015-04-15 19:55:00	18.8539	18.6511	18.652	18.8456	18.5375			28.6933	28.7529	28.9614	29.0962	28.9669
							2015-04-15 20:25:00	18.3095	18.1541	18.2212	18.4562	18.149			28.5106	28.5727	28.8034	28.9336	28.8369
							2015-04-15 20:55:00	17.9902	17.8714	17.9541	18.2165	17.9241			27.4202	27.602	27.9419	28.1646	28.1968
							2015-04-15 21:25:00	17.4716	17.3737	17.4494	17.7171	17.4238			26.0662	26.321	26.7223	27.0272	27.1869
				2015.9.3号			2015-04-15 21:55:00	17.1208	17.0034	17.0982	17.3746	17.0856			24.873	25.1775	25.6301	25.9718	26.2282
							2015-04-15 22:25:00	16.8868	16.7594	16.871	17.1398	16.8519			23.7342	24.0519	24.5387	24.9439	25.3435
							2015-04-15 22:55:00	16.7361	16.6296	16.7417	17.0372	16.7344			23.0042	23.3316	23.8077	24.1939	24.5374
							2015-04-15 23:25:00	16.6326	16.5457	16.6471	16.9153	16.6514			22.6599	22.9943	23.4569	23.8351	24.1965
							2015-04-15 23:55:00	16.5854	16.4667	16.5768	16.8715	16.5752			22.1745	22.5022	22.9347	23.2978	23.563
